# Supplementary material for: Antibacterial Activity of PVA Hydrogels Embedding Oxide Nanostructures Sensitized by Noble Metals and Ruthenium Dye
Source: MDPI journal article supplement (doi:10.3390/gels9080650), 2023-08-11
Supplement: s1 [file s1]

# Antibacterial Activity of PVA Hydrogels Embedding Oxide Nanostructures Sensitized by Noble Metals and Ruthenium Dye

Diana Pelinescu <sup>1,†</sup>, Mihai Anastasescu <sup>2,†</sup>, Veronica Bratan <sup>2</sup>, Valentin-Adrian Maraloiu <sup>3</sup>, Catalin Negrila <sup>3</sup>, Daiana Mitrea <sup>2</sup>, Jose Calderon-Moreno <sup>2</sup>, Silviu Preda <sup>2,\*</sup>, Ioana Catalina Gifu <sup>4</sup>, Adrian Stan <sup>5</sup>, Robertina Ionescu <sup>1</sup>, Ileana Stoica <sup>1</sup>, Crina Anastasescu <sup>2,\*</sup>, Maria Zaharescu <sup>2</sup> and Ioan Balint <sup>2</sup>

## AFM characterization of TiO<sub>2</sub> and SiO<sub>2</sub> powders modified with Au and Pt NPs

The morphology of the TiO<sub>2</sub> powder modified with AuNPs is presented in Figure S1a, while the TiO<sub>2</sub> powder modified with PtNPs (PtTiO<sub>2</sub> sample) is shown in Figure S1b. Each AFM image is accompanied by two arbitrary line-scans, plotted near the corresponding image. The Au and Pt morphologies, observed in Figures S1a,b, are replicated in the TiO<sub>2</sub> powders modified with AuNPs and PtNPs.

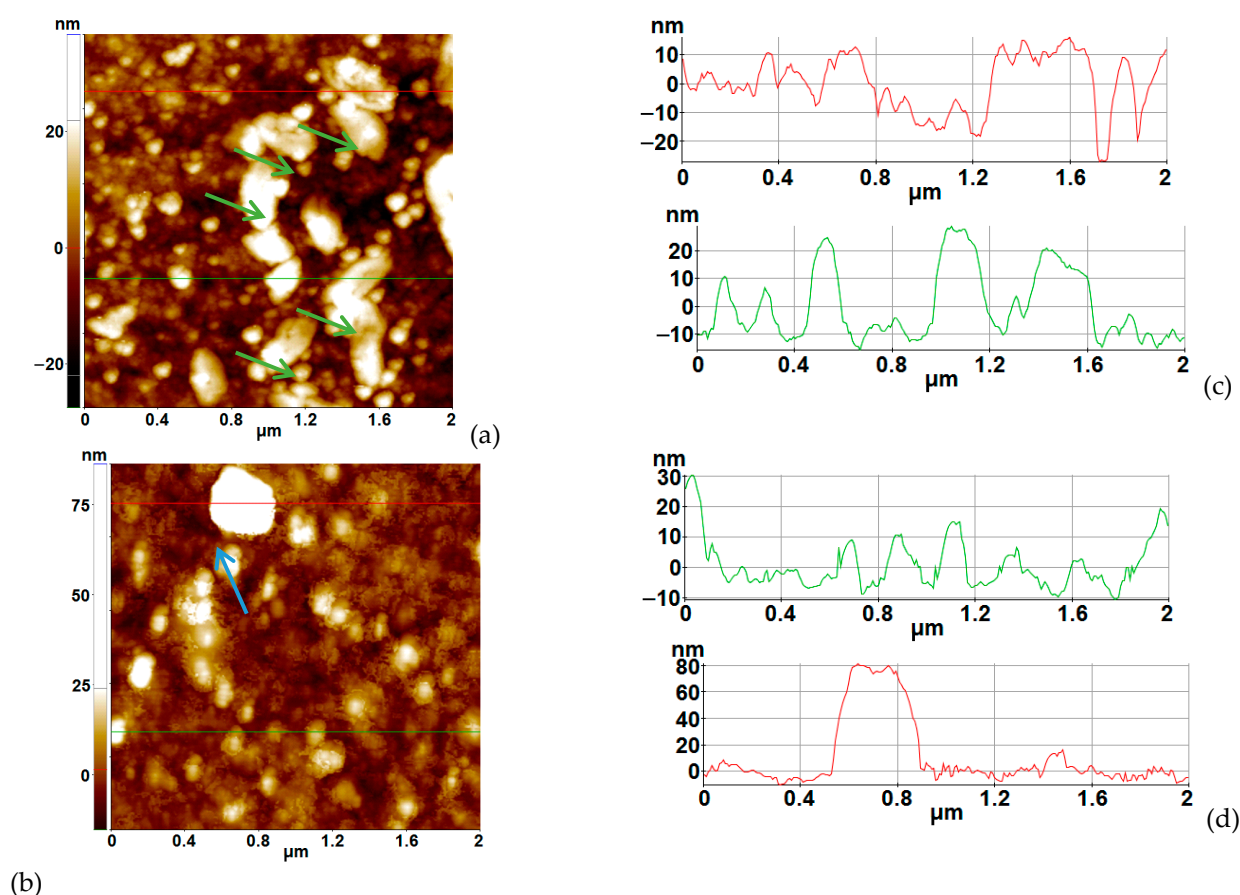

**Figure S1.** Topographic 2D AFM image of the TiO<sub>2</sub> powder modified with AuNPs (a) and, respectively, modified with PtNPs (b) scanned over (2μm x 2μm). Each AFM image is accompanied by two random line-scans (height *vs.* distance) corresponding to the scanned samples: TiO<sub>2</sub>-AuNPs (c) and TiO<sub>2</sub>-PtNPs (d).

The very small rounded particles (a few tens of nanometers in diameter) can be attributed to the TiO<sub>2</sub> matrix (anatase particles), while the larger ones, with a faceting

tendency can be assigned to AuNPs (indicated by the green arrows inserted for visual guidance in Figure S1a). In the Pt-modified  $\text{TiO}_2$  material ( $\text{PtTiO}_2$  - Figure S1b) a cluster of PtNPs (cauliflower-like) can be observed in the upper part (marked by the blue arrow). It can be also remarked that the morphology of Pt-modified  $\text{TiO}_2$  ( $\text{PtTiO}_2$ ) is slightly blurred, most likely due to the presence of sheet and nanowires, as indicated by TEM observations (Figure 2g from the Manuscript). The morphology of the  $\text{SiO}_2$  powder modified with Au and Pt is presented in Figures S2 and S3.

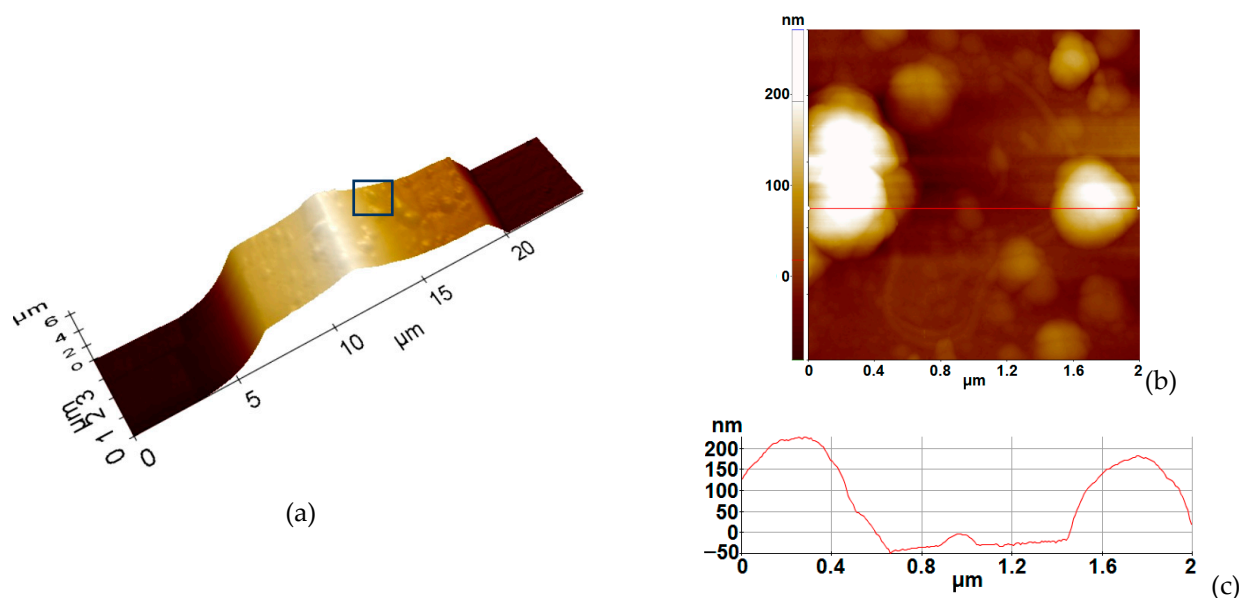

**Figure S2.** Part (slice) of a  $\text{SiO}_2$  tube exhibited in a 3D topographic AFM image at the scale of  $4\mu\text{m} \times 25\mu\text{m}$  – (a). Topographic 2D AFM image recorded on the walls of the  $\text{SiO}_2$  tube modified with AuNPs scanned over ( $2\mu\text{m} \times 2\mu\text{m}$ ) – (b); plot of a line-scan (height vs. distance) no. 118 – (c).

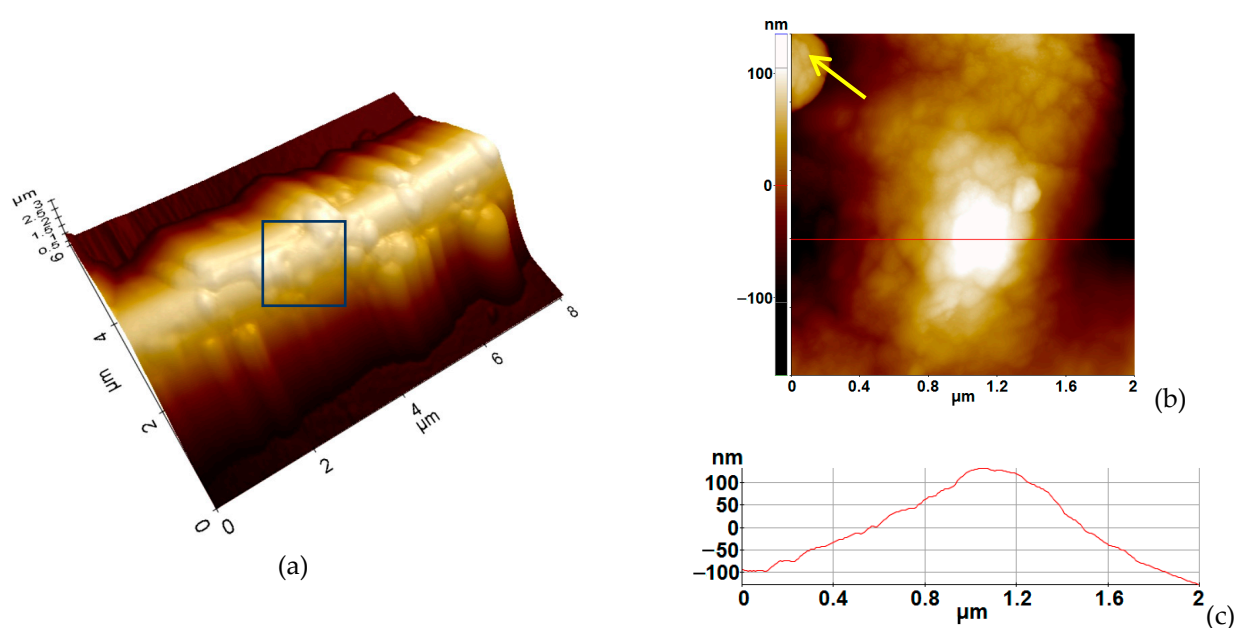

**Figure S3.** Part of a  $\text{SiO}_2$  tube exhibited in a 3D topographic AFM image at the scale of  $6\mu\text{m} \times 8\mu\text{m}$  – (a). Topographic 2D AFM image recorded on the walls of the  $\text{SiO}_2$  tube modified with PtNPs scanned over ( $2\mu\text{m} \times 2\mu\text{m}$ ) – (b); plot of a line-scan (height vs. distance) – (c).

The morphology of the SiO<sub>2</sub> powders being predominant tubular [Refs. 26–28 from the Manuscript], the AFM images were collected by placing the AFM tip on-top of the wall of one of the SiO<sub>2</sub> tubes. Figure S2a shows a portion of a very large SiO<sub>2</sub> tube, modified with Au (AuSiO<sub>2</sub> sample), based on a 3D AFM image at the scale of 4 μm × 25 μm, exhibiting a distinct texture. Figure S2b was obtained by scanning an area of 2 μm × 2 μm on the tube-wall, as schematically marked by a square in Figure S2a. The tube-wall is not smooth but covered with small and large particles, from tens to hundreds of nm – as indicated by the line-scan from Figure S2c, attributable to spherical SiO<sub>2</sub> particles and AuNPs, as already observed in TEM (Figure 2a from the Manuscript). Figure S3a presents a part of another large SiO<sub>2</sub> tub, modified with Pt (PtSiO<sub>2</sub> sample) based on a 3D AFM image recorded at the scale of 6 μm × 8 μm. Further on, Figure S3b was recorded on the tube's wall, presenting its morphology in detail. The dispersion of PtNPs within the SiO<sub>2</sub> wall tube appears to be better (as indicated by the TEM image in Figure 2c from the Manuscript) than for the AuNPs (despite the presence of the cauliflower-like structures, as shown by the yellow arrow in the upper left corner of Figure S3b) and the line-scan profile in Figure S3c.

Hydroxyl radicals generation under simulated solar irradiation by SiO<sub>2</sub> and TiO<sub>2</sub> based powders, free and embedded in PVA gel:

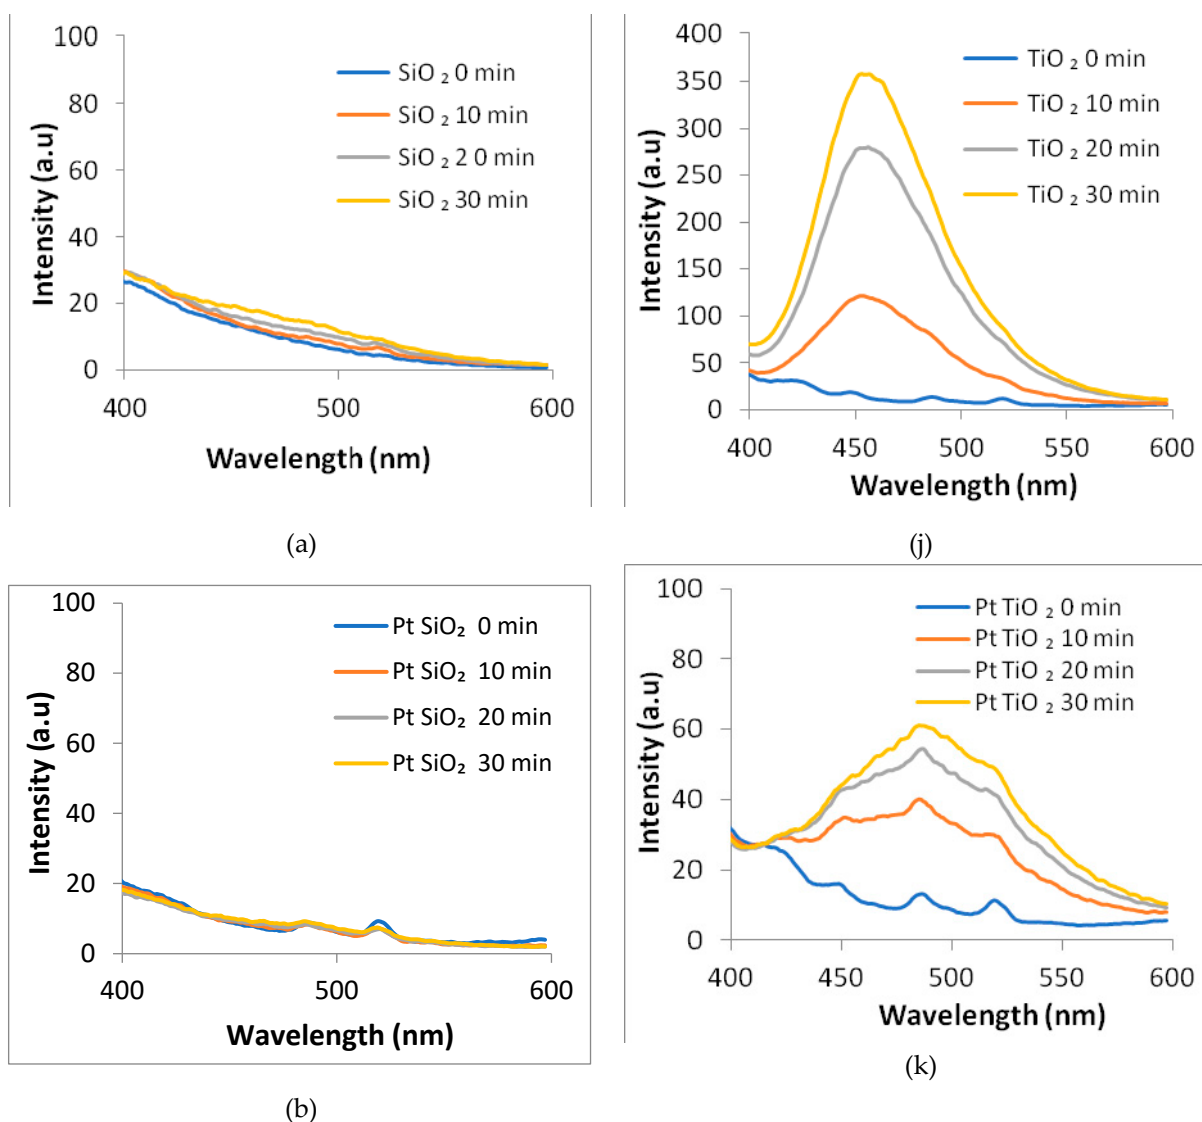

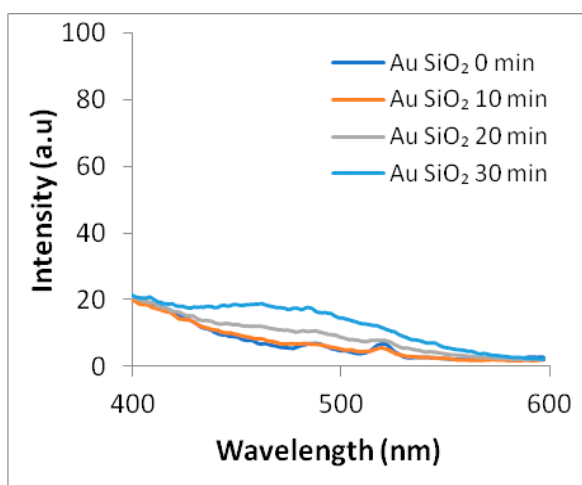

(c)

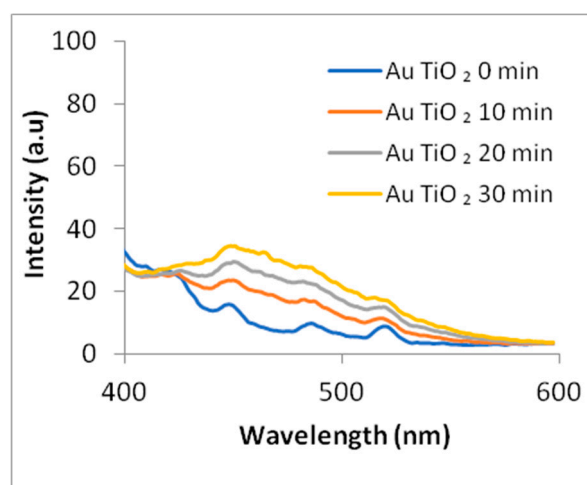

(l)

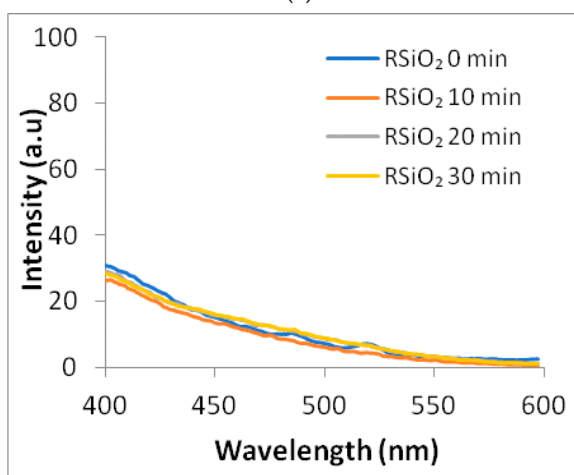

(d)

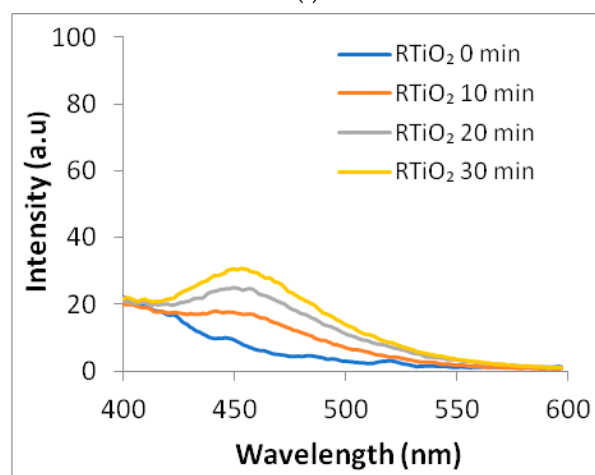

(m)

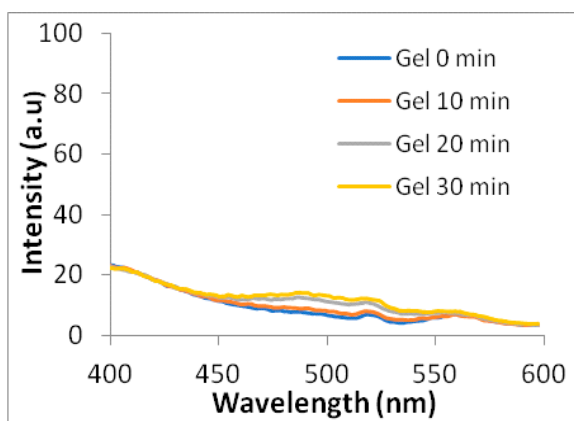

(e)

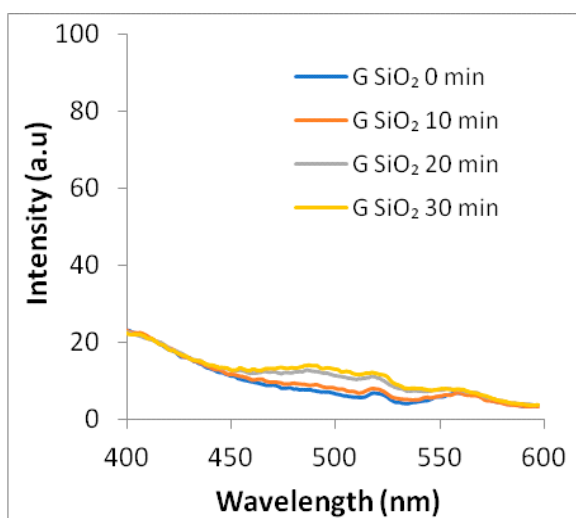

(f)

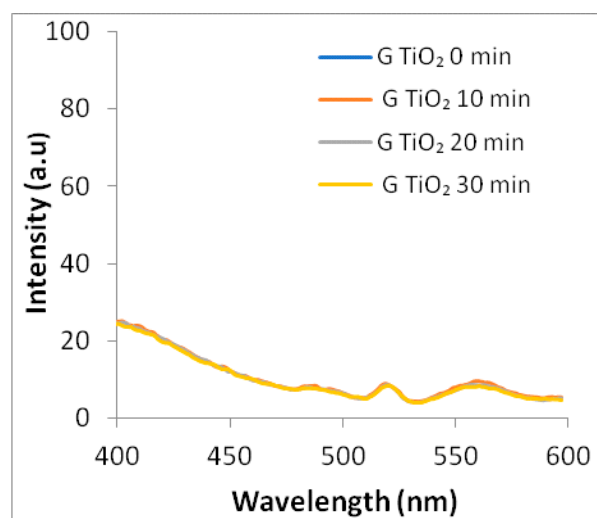

(n)

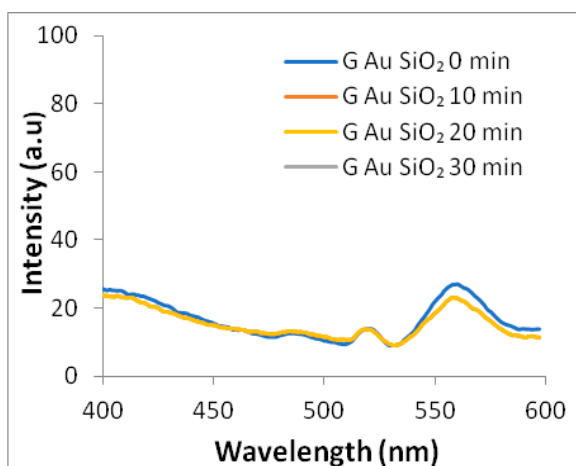

(g)

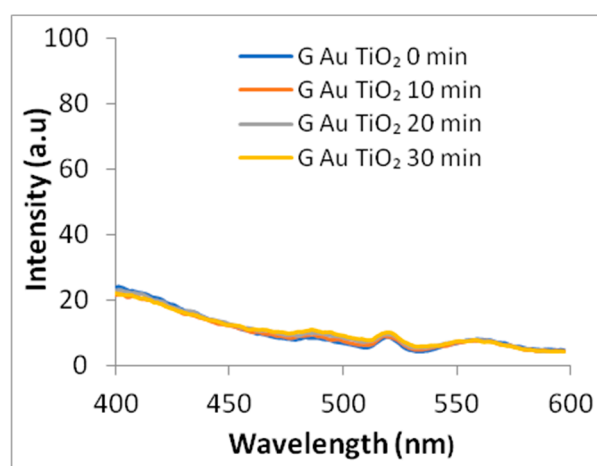

(o)

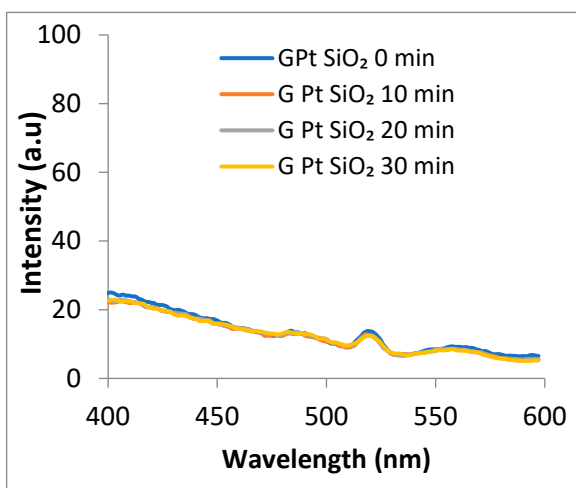

(h)

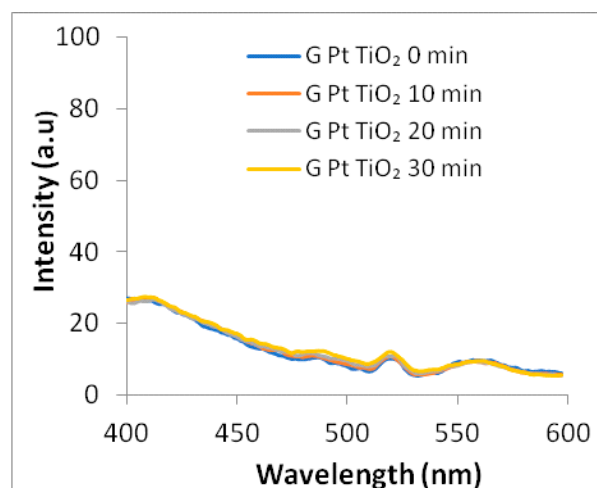

(p)

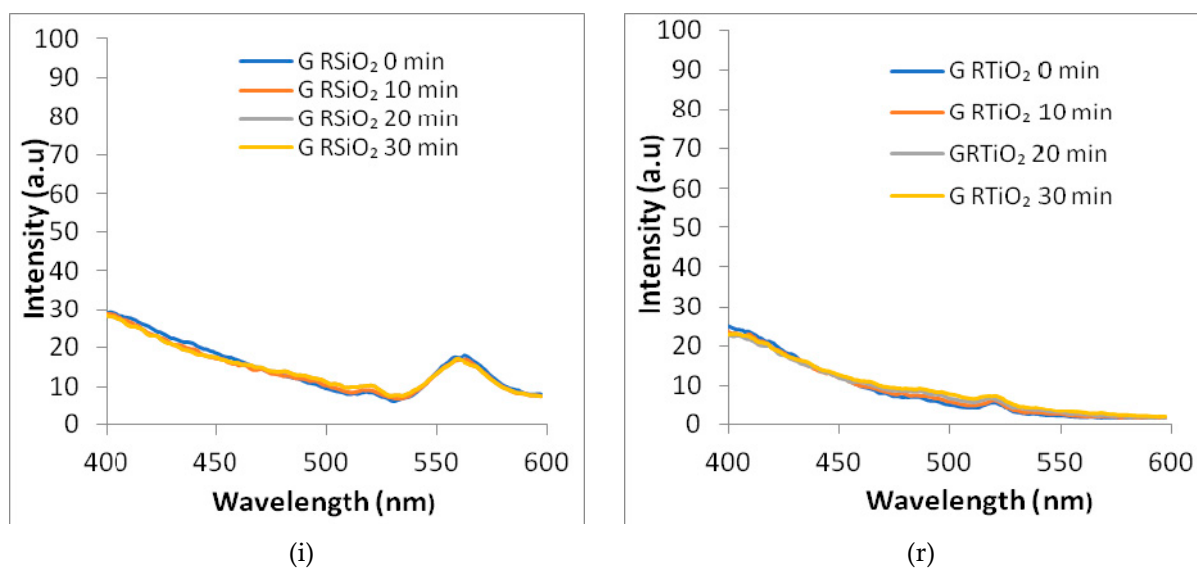

**Figure S4.** The generation of the hydroxyl radicals under simulated solar irradiation by SiO<sub>2</sub> and TiO<sub>2</sub> based powders, free and embedded in PVA gel.

#### Electrokinetic Potential measurements

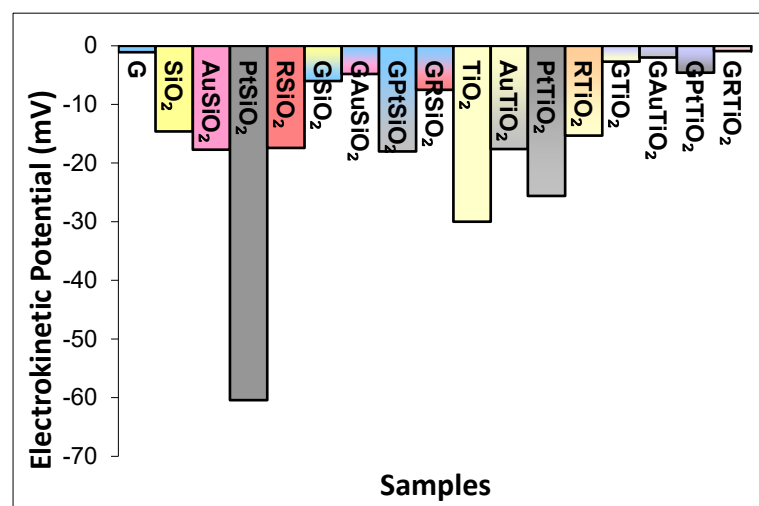

**Figure S5.** Electrokinetic potential measurements for SiO<sub>2</sub> and TiO<sub>2</sub>-based powders free and embedded in PVA gel. The experiments were made in triplicates.
